# Supplementary material for: Automated cardiovascular magnetic resonance image analysis with fully convolutional networks
Source: Springer Nature journal article supplement (doi:10.1186/s12968-018-0471-x), 2018-02-01

An in-house software generates segmentation images, which shows automated segmentation, manual segmentation and the difference map between the two segmentations to facilitate image analysts in visual qualitative assessment.

1012733, auto: LVEDV = 156mL, RVEDV = 147mL, LVM = 90g

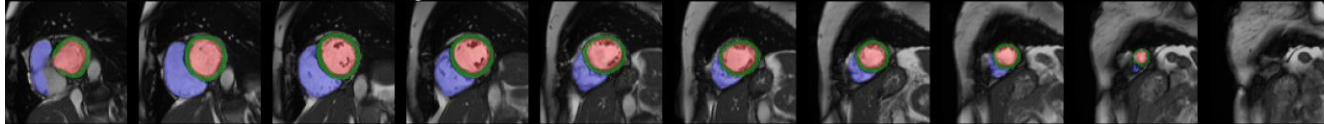

1012733, man: LVEDV = 154mL, RVEDV = 151mL, LVM = 91g

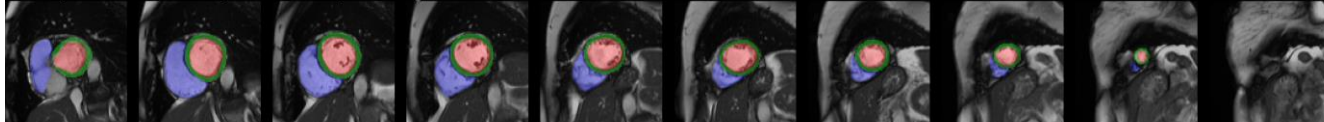

1012733, diff: LVEDV\_diff = 2mL, RVEDV\_diff = -4mL, LVM\_diff = -1g

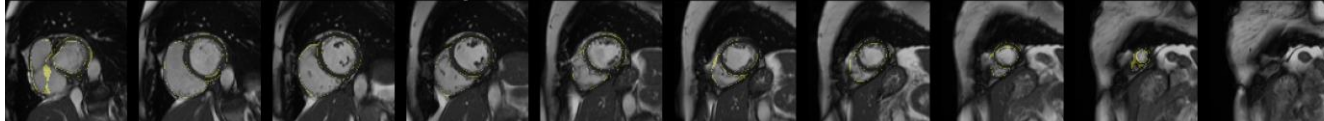

1012733, auto: LVESV = 64mL, RVESV = 60mL

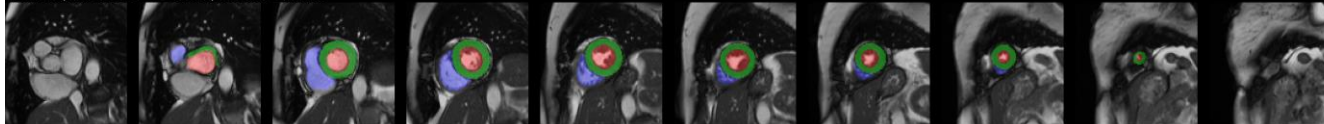

1012733, man: LVESV = 56mL, RVESV = 57mL

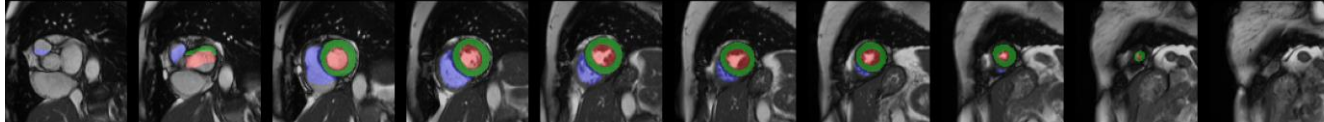

1012733, diff: LVESV\_diff = 8mL, RVESV\_diff = 3mL

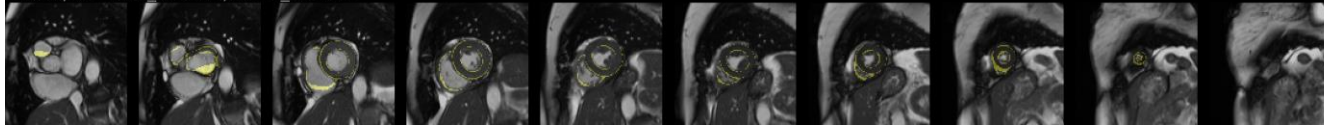

Supplement: MOESM1 [file 16125126]
